# Supplementary material for: Covert lie detection using keyboard dynamics
Source: PubMed Central journal article supplement (PMC5792443; doi:10.1038/s41598-018-20462-6), 2018-01-31
Supplement: 41598_2018_20462_MOESM1_ESM.pdf [file 41598_2018_20462_MOESM1_ESM.pdf]

# Covert lie detection using keyboard dynamics

Merylin Monaro<sup>1</sup>, Chiara Galante<sup>2</sup>, Riccardo Spolaor<sup>1</sup>, Qian Qian Li<sup>1</sup>, Luciano Gamberini<sup>2,3</sup>, Mauro Conti<sup>3,4</sup> and Giuseppe Sartori<sup>2,3\*</sup>

<sup>1</sup> PhD Program in Brain, Mind and Computer Science, University of Padova, 35122, Italy

<sup>2</sup> University of Padova, Department of General Psychology, Padova, 35131, Italy

<sup>3</sup> University of Padova, Human Inspired Technology Research Centre, Padova, 35122, Italy

<sup>4</sup> University of Padova, Department of Mathematics, Padova, 35131, Italy

[giuseppe.sartori@unipd.it](mailto:giuseppe.sartori@unipd.it)

## Supplementary Information

**Table S1. Complete list of the 62 attributes extracted for each subject's typed response.**

Number of errors  
Prompted-firstdigit  
Prompted-firstdigit adjusted GULPEASE  
Prompted-enter  
Firstdigit-enter  
Time before enter key down  
Time before enter key flight  
Answer length  
Writing time  
Di-graph down time average  
Di-graph down time maximum  
Di-graph down time minimum  
Di-graph down time median  
Di-graph down time standard deviation  
Di-graph down time variance  
Di-graph up time average  
Di-graph up time maximum  
Di-graph up time minimum  
Di-graph up time median  
Di-graph up time standard deviation  
Di-graph up time variance  
Di-graph up and down time average  
Di-graph up and down time maximum  
Di-graph up and down time minimum  
Di-graph up and down time median  
Di-graph up and down time standard deviation  
Di-graph up and down time variance  
Di-graph press time average  
Di-graph press time maximum  
Di-graph press time minimum  
Di-graph press time median  
Di-graph press time standard deviation  
Di-graph press time variance  
Di-graph flight time average  
Di-graph flight time maximum  
Di-graph flight time minimum  
Di-graph flight time median  
Di-graph flight time standard deviation  
Di-graph flight time variance  
Tri-graph down time average  
Tri-graph down time maximum  
Tri-graph down time minimum  
Tri-graph down time median  
Tri-graph down time standard deviation  
Tri-graph down time variance

Tri -graph up time average  
 Tri -graph up time maximum  
 Tri -graph up time minimum  
 Tri -graph up time median  
 Tri -graph up time standard deviation  
 Tri -graph up time variance  
 Tri -graph up and down time average  
 Tri -graph up and down time maximum  
 Tri -graph up and down time minimum  
 Tri -graph up and down time median  
 Tri -graph up and down time standard deviation  
 Tri -graph up and down time variance  
 Number of Shift  
 Number of Del  
 Number of Canc  
 Number of Space  
 Number of Arrows

**Table S2. Classification accuracies and metrics obtained by eliminating one by one the five final predictors (errors, prompted-firstdigit adjusted GULPEASE, firstdigit-enter, writing time, time key before enter down).**

Results obtained by eliminating errors:

| <b>10-fold cross-validation</b> |                 |                |                |                  |               |                  |                 |                 |
|---------------------------------|-----------------|----------------|----------------|------------------|---------------|------------------|-----------------|-----------------|
| <b>Classifier</b>               | <b>Accuracy</b> | <b>TP Rate</b> | <b>FP Rate</b> | <b>Precision</b> | <b>Recall</b> | <b>F-Measure</b> | <b>ROC Area</b> | <b>PRC Area</b> |
| Logistic                        | 82.5%           | 0.825          | 0.175          | 0.826            | 0.825         | 0.825            | 0.865           | 0.852           |
| SVM (SMO)                       | 82.5%           | 0.825          | 0.175          | 0.832            | 0.825         | 0.824            | 0.825           | 0.771           |
| LMT                             | 82.5%           | 0.825          | 0.175          | 0.826            | 0.825         | 0.825            | 0.915           | 0.913           |
| Random Forest                   | 82.5%           | 0.825          | 0.175          | 0.826            | 0.825         | 0.825            | 0.834           | 0.794           |
| <b>Test</b>                     |                 |                |                |                  |               |                  |                 |                 |
| <b>Classifier</b>               | <b>Accuracy</b> | <b>TP Rate</b> | <b>FP Rate</b> | <b>Precision</b> | <b>Recall</b> | <b>F-Measure</b> | <b>ROC Area</b> | <b>PRC Area</b> |
| Logistic                        | 65%             | 0.650          | 0.350          | 0.700            | 0.650         | 0.627            | 0.850           | 0.865           |
| SVM (SMO)                       | 65%             | 0.650          | 0.350          | 0.700            | 0.650         | 0.627            | 0.650           | 0.605           |
| LMT                             | 65%             | 0.650          | 0.350          | 0.700            | 0.650         | 0.627            | 0.840           | 0.81            |
| Random Forest                   | 70%             | 0.700          | 0.300          | 0.730            | 0.700         | 0.688            | 0.865           | 0.864           |

Results obtained by eliminating prompted-firstdigit adjusted GULPEASE:

| <b>10-fold cross-validation</b> |                 |                |                |                  |               |                  |                 |                 |
|---------------------------------|-----------------|----------------|----------------|------------------|---------------|------------------|-----------------|-----------------|
| <b>Classifier</b>               | <b>Accuracy</b> | <b>TP Rate</b> | <b>FP Rate</b> | <b>Precision</b> | <b>Recall</b> | <b>F-Measure</b> | <b>ROC Area</b> | <b>PRC Area</b> |
| Logistic                        | 92.5%           | 0.925          | 0.075          | 0.926            | 0.925         | 0.925            | 0.967           | 0.957           |
| SVM (SMO)                       | 92.5%           | 0.925          | 0.075          | 0.935            | 0.925         | 0.925            | 0.925           | 0.897           |
| LMT                             | 92.5%           | 0.925          | 0.075          | 0.935            | 0.925         | 0.925            | 0.993           | 0.993           |

|                   |                 |                |                |                  |               |                  |                 |                 |
|-------------------|-----------------|----------------|----------------|------------------|---------------|------------------|-----------------|-----------------|
| Random Forest     | 95%             | 0.950          | 0.050          | 0.950            | 0.950         | 0.950            | 0.972           | 0.972           |
| <b>Test</b>       |                 |                |                |                  |               |                  |                 |                 |
| <b>Classifier</b> | <b>Accuracy</b> | <b>TP Rate</b> | <b>FP Rate</b> | <b>Precision</b> | <b>Recall</b> | <b>F-Measure</b> | <b>ROC Area</b> | <b>PRC Area</b> |
| Logistic          | 90%             | 0.900          | 0.100          | 0.917            | 0.900         | 0.899            | 0.970           | 0.950           |
| SVM (SMO)         | 90%             | 0.900          | 0.100          | 0.917            | 0.900         | 0.899            | 0.900           | 0.867           |
| LMT               | 95%             | 0.950          | 0.050          | 0.955            | 0.950         | 0.950            | 1.000           | 1.000           |
| Random Forest     | 100%            | 1.000          | 0.000          | 1.000            | 1.000         | 1.000            | 1.000           | 1.000           |

Results obtained by eliminating firstdigit-enter:

|                                 |                 |                |                |                  |               |                  |                 |                 |
|---------------------------------|-----------------|----------------|----------------|------------------|---------------|------------------|-----------------|-----------------|
| <b>10-fold cross-validation</b> |                 |                |                |                  |               |                  |                 |                 |
| <b>Classifier</b>               | <b>Accuracy</b> | <b>TP Rate</b> | <b>FP Rate</b> | <b>Precision</b> | <b>Recall</b> | <b>F-Measure</b> | <b>ROC Area</b> | <b>PRC Area</b> |
| Logistic                        | 92.5%           | 0.925          | 0.075          | 0.926            | 0.925         | 0.925            | 0.964           | 0.953           |
| SVM (SMO)                       | 95%             | 0.950          | 0.050          | 0.950            | 0.950         | 0.950            | 0.950           | 0.928           |
| LMT                             | 97.5%           | 0.975          | 0.025          | 0.976            | 0.975         | 0.975            | 1.000           | 1.000           |
| Random Forest                   | 92.5%           | 0.925          | 0.075          | 0.926            | 0.925         | 0.925            | 0.974           | 0.974           |
| <b>Test</b>                     |                 |                |                |                  |               |                  |                 |                 |
| <b>Classifier</b>               | <b>Accuracy</b> | <b>TP Rate</b> | <b>FP Rate</b> | <b>Precision</b> | <b>Recall</b> | <b>F-Measure</b> | <b>ROC Area</b> | <b>PRC Area</b> |
| Logistic                        | 100%            | 1.000          | 0.000          | 1.000            | 1.000         | 1.000            | 1.000           | 1.000           |
| SVM (SMO)                       | 95%             | 0.950          | 0.050          | 0.950            | 0.950         | 0.950            | 0.950           | 0.928           |
| LMT                             | 90%             | 0.900          | 0.100          | 0.917            | 0.900         | 0.899            | 1.000           | 1.000           |
| Random Forest                   | 95%             | 0.950          | 0.050          | 0.955            | 0.950         | 0.950            | 0.990           | 0.991           |

Results obtained by eliminating writing time:

|                                 |                 |                |                |                  |               |                  |                 |                 |
|---------------------------------|-----------------|----------------|----------------|------------------|---------------|------------------|-----------------|-----------------|
| <b>10-fold cross-validation</b> |                 |                |                |                  |               |                  |                 |                 |
| <b>Classifier</b>               | <b>Accuracy</b> | <b>TP Rate</b> | <b>FP Rate</b> | <b>Precision</b> | <b>Recall</b> | <b>F-Measure</b> | <b>ROC Area</b> | <b>PRC Area</b> |
| Logistic                        | 92.5%           | 0.925          | 0.075          | 0.926            | 0.925         | 0.925            | 0.951           | 0.947           |
| SVM (SMO)                       | 95%             | 0.950          | 0.050          | 0.950            | 0.950         | 0.950            | 0.950           | 0.928           |
| LMT                             | 97.5%           | 0.975          | 0.025          | 0.976            | 0.975         | 0.975            | 1.000           | 1.000           |
| Random Forest                   | 90%             | 0.900          | 0.100          | 0.900            | 0.900         | 0.900            | 0.974           | 0.975           |
| <b>Test</b>                     |                 |                |                |                  |               |                  |                 |                 |
| <b>Classifier</b>               | <b>Accuracy</b> | <b>TP Rate</b> | <b>FP Rate</b> | <b>Precision</b> | <b>Recall</b> | <b>F-Measure</b> | <b>ROC Area</b> | <b>PRC Area</b> |
| Logistic                        | 100%            | 1.000          | 0.000          | 1.000            | 1.000         | 1.000            | 1.000           | 1.000           |

|               |     |       |       |       |       |       |       |       |
|---------------|-----|-------|-------|-------|-------|-------|-------|-------|
| SVM (SMO)     | 90% | 0.900 | 0.100 | 0.917 | 0.900 | 0.899 | 0.900 | 0.867 |
| LMT           | 90% | 0.900 | 0.100 | 0.917 | 0.900 | 0.899 | 1.000 | 1.000 |
| Random Forest | 95% | 0.950 | 0.050 | 0.955 | 0.950 | 0.950 | 1.000 | 1.000 |

Results obtained by eliminating time before enter key down:

| <b>10-fold cross-validation</b> |                 |                |                |                  |               |                  |                 |                 |
|---------------------------------|-----------------|----------------|----------------|------------------|---------------|------------------|-----------------|-----------------|
| <b>Classifier</b>               | <b>Accuracy</b> | <b>TP Rate</b> | <b>FP Rate</b> | <b>Precision</b> | <b>Recall</b> | <b>F-Measure</b> | <b>ROC Area</b> | <b>PRC Area</b> |
| Logistic                        | 90%             | 0.900          | 0.100          | 0.900            | 0.900         | 0.900            | 0.980           | 0.982           |
| SVM (SMO)                       | 95%             | 0.950          | 0.050          | 0.950            | 0.950         | 0.950            | 0.950           | 0.928           |
| LMT                             | 97.5%           | 0.975          | 0.025          | 0.976            | 0.975         | 0.975            | 1.000           | 1.000           |
| Random Forest                   | 90%             | 0.900          | 0.100          | 0.900            | 0.900         | 0.900            | 0.976           | 0.977           |
| <b>Test</b>                     |                 |                |                |                  |               |                  |                 |                 |
| <b>Classifier</b>               | <b>Accuracy</b> | <b>TP Rate</b> | <b>FP Rate</b> | <b>Precision</b> | <b>Recall</b> | <b>F-Measure</b> | <b>ROC Area</b> | <b>PRC Area</b> |
| Logistic                        | 90%             | 0.900          | 0.100          | 0.917            | 0.900         | 0.899            | 0.980           | 0.982           |
| SVM (SMO)                       | 90%             | 0.900          | 0.100          | 0.917            | 0.900         | 0.899            | 0.900           | 0.867           |
| LMT                             | 90%             | 0.900          | 0.100          | 0.917            | 0.900         | 0.899            | 1.000           | 1.000           |
| Random Forest                   | 95%             | 0.950          | 0.050          | 0.955            | 0.950         | 0.950            | 0.990           | 0.991           |

**Table S3. Classification accuracies and metrics obtained by analysing only control questions.**

| <b>10-fold cross-validation</b> |                 |                |                |                  |               |                  |                 |                 |
|---------------------------------|-----------------|----------------|----------------|------------------|---------------|------------------|-----------------|-----------------|
| <b>Classifier</b>               | <b>Accuracy</b> | <b>TP Rate</b> | <b>FP Rate</b> | <b>Precision</b> | <b>Recall</b> | <b>F-Measure</b> | <b>ROC Area</b> | <b>PRC Area</b> |
| Logistic                        | 40%             | 0.400          | 0.600          | 0.400            | 0.400         | 0.400            | 0.303           | 0.398           |
| SVM (SMO)                       | 45%             | 0.450          | 0.550          | 0.448            | 0.450         | 0.444            | 0.450           | 0.478           |
| LMT                             | 45%             | 0.450          | 0.550          | 0.237            | 0.450         | 0.310            | 0.405           | 0.476           |
| Random Forest                   | 55%             | 0.550          | 0.450          | 0.550            | 0.550         | 0.550            | 0.530           | 0.538           |
| <b>Test</b>                     |                 |                |                |                  |               |                  |                 |                 |
| <b>Classifier</b>               | <b>Accuracy</b> | <b>TP Rate</b> | <b>FP Rate</b> | <b>Precision</b> | <b>Recall</b> | <b>F-Measure</b> | <b>ROC Area</b> | <b>PRC Area</b> |
| Logistic                        | 60%             | 0.600          | 0.400          | 0.619            | 0.600         | 0.538            | 0.630           | 0.627           |
| SVM (SMO)                       | 45%             | 0.450          | 0.550          | 0.402            | 0.450         | 0.373            | 0.450           | 0.480           |
| LMT                             | 50%             | 0.500          | 0.500          | 0.250            | 0.500         | 0.333            | 0.500           | 0.500           |
| Random Forest                   | 40%             | 0.400          | 0.600          | 0.396            | 0.400         | 0.394            | 0.390           | 0.494           |

**Table S4. Classification accuracies and metrics obtained using a new set of predictors (errors, prompted-firstdigit, prompted-enter, time before enter key flight, di-graph down time average).**

| <b>10-fold cross-validation</b> |                 |                |                |                  |               |                  |                 |                 |
|---------------------------------|-----------------|----------------|----------------|------------------|---------------|------------------|-----------------|-----------------|
| <b>Classifier</b>               | <b>Accuracy</b> | <b>TP Rate</b> | <b>FP Rate</b> | <b>Precision</b> | <b>Recall</b> | <b>F-Measure</b> | <b>ROC Area</b> | <b>PRC Area</b> |
| Logistic                        | 92.5%           | 0.925          | 0.075          | 0.926            | 0.925         | 0.925            | 0.938           | 0.921           |
| SVM (SMO)                       | 95%             | 0.950          | 0.050          | 0.950            | 0.950         | 0.950            | 0.950           | 0.928           |
| LMT                             | 97.5%           | 0.975          | 0.025          | 0.976            | 0.975         | 0.975            | 1.000           | 1.000           |
| Random Forest                   | 90%             | 0.900          | 0.100          | 0.904            | 0.900         | 0.900            | 0.974           | 0.973           |
| <b>Test</b>                     |                 |                |                |                  |               |                  |                 |                 |
| <b>Classifier</b>               | <b>Accuracy</b> | <b>TP Rate</b> | <b>FP Rate</b> | <b>Precision</b> | <b>Recall</b> | <b>F-Measure</b> | <b>ROC Area</b> | <b>PRC Area</b> |
| Logistic                        | 100%            | 1.000          | 0.000          | 1.000            | 1.000         | 1.000            | 1.000           | 1.000           |
| SVM (SMO)                       | 90%             | 0.900          | 0.100          | 0.917            | 0.900         | 0.899            | 0.900           | 0.867           |
| LMT                             | 90%             | 0.900          | 0.100          | 0.917            | 0.900         | 0.899            | 1.000           | 1.000           |
| Random Forest                   | 90%             | 0.900          | 0.100          | 0.917            | 0.900         | 0.899            | 1.000           | 1.000           |

**Table S5. Classification accuracy and metrics obtained from the one-class classifier.**

| <b>Test</b>          |                 |                |                |                  |               |                  |                 |                 |
|----------------------|-----------------|----------------|----------------|------------------|---------------|------------------|-----------------|-----------------|
| <b>Classifier</b>    | <b>Accuracy</b> | <b>TP Rate</b> | <b>FP Rate</b> | <b>Precision</b> | <b>Recall</b> | <b>F-Measure</b> | <b>ROC Area</b> | <b>PRC Area</b> |
| One-class classifier | 85%             | 0.850          | 0.150          | 0.885            | 0.850         | 0.847            | 1.000           | 1.000           |

**Table S6. Classification accuracies and metrics obtained testing the new sample of 151 online-participants, using a new set of predictors (errors, prompted-firstdigit, prompted-enter, time before enter key flight, di-graph down time average).**

| <b>Test on 151 online-recruited participants</b> |                 |                |                |                  |               |                  |                 |                 |
|--------------------------------------------------|-----------------|----------------|----------------|------------------|---------------|------------------|-----------------|-----------------|
| <b>Classifier</b>                                | <b>Accuracy</b> | <b>TP Rate</b> | <b>FP Rate</b> | <b>Precision</b> | <b>Recall</b> | <b>F-Measure</b> | <b>ROC Area</b> | <b>PRC Area</b> |
| Logistic                                         | 90.1%           | 0.901          | 0.098          | 0.902            | 0.901         | 0.901            | 0.958           | 0.947           |
| SVM (SMO)                                        | 90.1%           | 0.901          | 0.083          | 0.911            | 0.901         | 0.901            | 0.909           | 0.871           |
| LMT                                              | 90.7%           | 0.907          | 0.074          | 0.920            | 0.907         | 0.908            | 0.960           | 0.954           |
| Random Forest                                    | 90%             | 0.900          | 0.100          | 0.904            | 0.900         | 0.900            | 0.974           | 0.973           |
